# Supplementary material for: Effect of Defects on the Mechanical and Thermal Properties of Graphene
Source: PubMed Central journal article supplement (PMC6474032; doi:10.3390/nano9030347), 2019-03-03
Supplement: nanomaterials-09-00347-s001.pdf [file nanomaterials-09-00347-s001.pdf]

# Supplementary Information

## Effect of Defects on the Mechanical and Thermal Properties of Graphene

Maoyuan Li <sup>1</sup>, Tianzhengxiong Deng <sup>1</sup>, Bing Zheng <sup>1</sup>, Yun Zhang <sup>1,\*</sup>, Yonggui Liao <sup>2</sup> and Huamin Zhou <sup>1</sup>

<sup>1</sup> State Key Laboratory of Material Processing and Die & Mold Technology, Huazhong University of Science and Technology, Wuhan 430074, Hubei, China; limaoyuan@hust.edu.cn (M.L.); uezuuezu@hust.edu.cn (T.D.); zhengbing@hust.edu.cn (B.Z.); hmzhou@hust.edu.cn (H.Z.)

<sup>2</sup> Key Laboratory of Material Chemistry for Energy Conversion and Storage, School of Chemistry and Chemical Engineering, Huazhong University of Science and Technology, Ministry of Education, Wuhan 430074, Hubei, China; ygliao@mail.hust.edu.cn (Y.L.)

\* Correspondence: marblezy@hust.edu.cn; Tel.: +86-27-87543492

---

### I. The LAMMPS script for calculating thermal and mechanical properties of Gr

#### a. Uniaxial tensile test

```
units      metal
dimension 3
boundary  p p s
atom style full
read_data graphene. Data
pair_style      airebo 3.0 1 1
pair_coeff      ** CH.airebo C
neighbor 3.0 nsq
neigh_modify  delay 0      every 1 check yes
variable temperature equal 300
variable timestep equal 0.001
variable pressure equal 0
variable thermalstep equal 100
variable dumpstep equal 50000
variable relaxtime equal 200000
variable totaltime equal 500000
variable deformrate equal 0.0005
variable strain_max equal 0.3
variable total_runs equal round(v_strain_max/(v_tstep*v_deformrate))
velocity all create ${temperature} 1000000 rot yes dist gaussian
min_style      cg
minimize      1.0e-14 1.0e-14 10000 10000
unfix 1
fix      relax all npt temp ${temperature} ${temperature} 0.05 x 0 0.5 y 0 0.5 drag 0.2
dump      config all custom 100000 relax.*.lammprj id type x y z
thermo 1000
thermo_style      custom step temp etotal pxx pyy pzz press
restart      100000 relax.*.restart
timestep ${tstep}
run      ${relaxtime}
```

```

unfix relax
undump config
reset_timestep 0
variable toval equal lx*lx*3.35
variable vol equal ${toval}
variable vatom equal v_vol/v_nums
compute 1 all stress/atom NULL
variable total equal etotal
variable pair equal epair
variable bond equal ebond
variable angle equal eangle
variable dihedral equal edihed
compute xalls all reduce sum c_1[1]
variable xstress equal (c_xalls)/(v_toval*10000)
compute yalls all reduce sum c_1[2]
variable ystress equal (c_yalls)/(v_toval*10000)
compute zalls all reduce sum c_1[3]
variable zstress equal (c_zalls)/(v_toval*10000)
timestep      ${tstep}
thermo        2000
fix avestress all ave/atom 1 ${dumpstep} ${dumpstep} c_1[1] c_1[2] c_1[3] c_1[4] c_1[5] c_1[6]
variable      tmp equal "lx"
variable      L0 equal ${tmp}
variable      strain equal "(lx - v_L0)/v_L0"
variable      Cumulativels equal "(lx - v_L0)/10"
fix Step all print 100 "${strain} ${Cumulativels} ${xstress} ${total} ${bond} ${pair} ${angle}
${dihedral}" file grapoten.txt screen no
dump 2 all custom ${dumpstep} relax.*.lammpstrj id type x y z f_avestress[1] f_avestress[2]
f_avestress[3] f_avestress[4] f_avestress[5] f_avestress[6]
fix 1 all nvt temp ${temperature} ${temperature} 0.05
fix 3 all deform 1 x erate ${deformrate} units box remap x
fix 4 all ave/time 2 500 1000 v_xstress v_ystress v_zstress file pressure.out
thermo_style custom step pe ke etotal lx ly lz v_strain v_xstress
run ${total_runs}

```

*b. NEMD for calculating TC*

```

log $nlammps.log
units      metal
variable  T equal 300
variable  dt equal 0.0005
variable  th equal 310
variable  tl equal 290
variable  kB equal 1.3806504e-23
variable  eV2J equal 1.602763e-19
variable  A2m equal 1.0e-10
variable  ps2s equal 1.0e-12
atom_style full
dimension 3
boundary  f p s
neighbor 0.3 nsq
read_data graphene.data

```

```

pair_style      airebo      3.0  1  1
pair_coeff      * *         CH.airebo  C
neighbor        3.0 nsq
neigh_modify    delay 0     every 1 check yes
variable xlength equal "lx"
variable L1 equal ${xlength}
variable dx equal ${L1}/50
variable xlo equal "xlo"
variable xh equal ${xlo}
variable xl equal ${xh}+${L1}
variable xf1 equal ${xh}+${dx}
variable xf2 equal ${xl}-${dx}
variable xh1 equal ${xh}+${dx}
variable xh2 equal ${xh}+${dx}*5
variable xc2 equal ${xl}-${dx}*5
region rgbhigh block INF ${xf1} INF INF INF INF units box
region rgblow block ${xf2} INF INF INF INF INF units box
group gbhigh region rgbhigh
group gblow region rgblow
fix 2 gbhigh setforce 0 0 0
fix 3 gblow setforce 0 0 0
region hot block ${xh1} ${xh2} INF INF INF INF units box
compute Thot all temp/region hot
region cold block ${xc2} ${xf2} INF INF INF INF units box
compute Tcold all temp/region cold
region 1 block ${xf1} ${xf2} INF INF INF INF units box
compute Tbetween all temp/region 1
group between region 1
timestep ${dt}
thermo 100000
compute ke all ke/atom
variable temp_atom c_ke*${eV2}]/(1.5*${kB}) ##### T
variable tempatom atom c_ke*${eV2}]*2/3/${kB}
velocity between create ${T} 3$N16$N8 mom yes rot yes dist gaussian
min_style cg
minimize 1e-25 1e-25 5000 10000
fix 111 between nvt temp ${T} ${T} 0.05
timestep ${dt}
thermo 10000
thermo_modify lost warn
run 1000000
write_restart $nrestart.1
unfix 111
fix nve between nve
run 1000000
write_restart $nrestart.2
unfix nve
fix 1 between nve
compute cc1 between chunk/atom bin/1d x lower 0.02 units reduced
fix cc1 between ave/chunk 10 100000 1000000 cc1 v_temp file $ntemp.profile1 ave running
fix hot all langevin ${th} ${th} 0.025 59$N80$N4 tally yes
fix cold all langevin ${tl} ${tl} 0.025 2$N859$N2 tally yes

```

```

fix_modify hot temp Thot
fix_modify cold temp Tcold
run 2000000
unfix cc1
unfix hot
unfix cold
unfix 1
write_restart $nrestart.data
reset_timestep 0
fix 1 between nve
fix hot all langevin ${th} ${th} 0.025 59$80$4 tally yes
fix cold all langevin ${tl} ${tl} 0.025 2$859$2 tally yes
fix_modify hot temp Thot
fix_modify cold temp Tcold
compute cc2 between chunk/atom bin/1d x lower 0.02 units reduced
fix cc2 between ave/chunk 10 100000 1000000 cc2 v_temp file $ntemp.profile2 ave running
fix e_exchange all ave/time 100000 1 100000 f_hot f_cold file $ne_exchange.dat
run 20000000

```

II. The measured value of TC during steady-state simulation

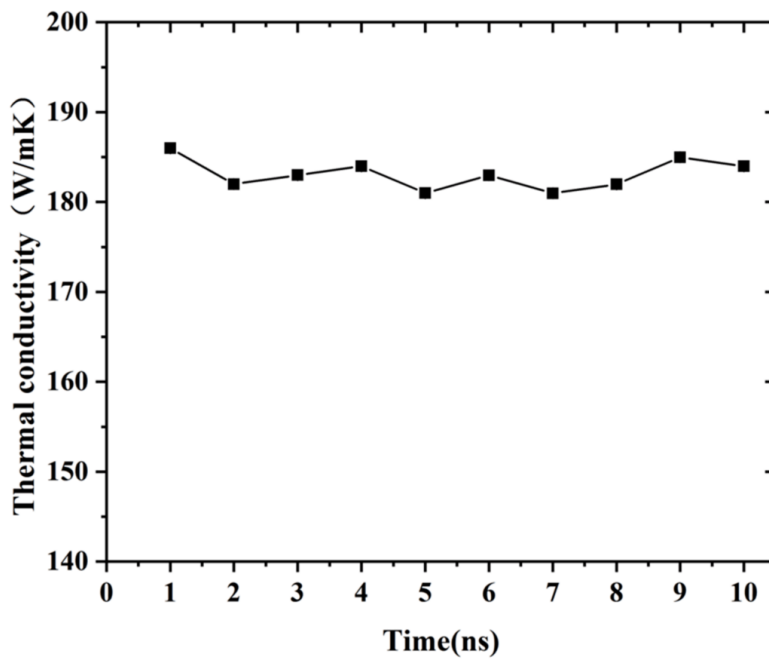

Figure S1. The measured value of TC with respect to simulation time during steady-state simulation.
